# Supplementary material
Source: Springer Nature journal article supplement (https://www.springermedizin.de/resource/supplementary/12914_2008_64_MOESM2_ESM.pdf/9537504)
Supplement: MOESM2 [file 9537504]

Cost of Cholera in WHO African Region

**"Hotel" Component**

- Administration
- Health personnel remunerations
- Inservice training
- Per diem for personnel
- Transport for personnel
  - Materials
- Utilities (i.e., electricity, water, telephone, and postage)
- Maintenance (of vehicles, equipment, and buildings)
  - Capital costs (i.e., vehicles, equipment, and buildings)

**Diagnosis**

- Inputs used in laboratory test for vibrio cholerae

**Medicines**

*Mild/moderate state:*  
- Oral rehydration salts (ORS)

*Severe state:*  
- Doxycycline  
- Erythromycin  
- Ringer Lactate

**Costs borne by patients & family members**

- Consultation fees
  - Medicines
  - Tests
  - Transport

**Productivity losses**

- Time of hospitalized cases in severe state
- Reduction in function performance for mild/moderate cases
- Time of family carers
  - Time lost due to premature death

**Other losses**

- Loss in tourism incomes
- Loss in revenues from export of goods (due to international ban)
